# Supplementary material for: Terrestrial and marine sources of ice nucleating particles in the Eurasian Arctic
Source: Royal Society of Chemistry journal article supplement (doi:10.1039/d4fd00160e), 2024-12-02
Supplement: d4fd00160e1.pdf [file d4fd00160e1.pdf]

# Terrestrial and Marine Sources of Ice Nucleating Particles in the Eurasian Arctic

Guangyu Li<sup>1\*</sup>, André Welti<sup>2</sup>, Arianna Rocchi<sup>3</sup>, Germán Pérez Fogwill<sup>2</sup>, Manuel Dall'Osto<sup>3</sup>, and Zamin A. Kanji<sup>1</sup>

<sup>1</sup>Institute for Atmospheric and Climate Science, ETH Zurich, Switzerland

<sup>2</sup>Finnish Meteorological Institute, Helsinki, Finland

<sup>3</sup>Department of Marine Biology and Oceanography, Institute of Marine Sciences (ICM, CSIC), Barcelona, Spain

\*Now at: Department of Carbon Emissions and Environmental Evolution, Deqing Academy of Satellite Applications, Deqing, China

**Correspondence:** Guangyu Li (lgy526462219@gmail.com) and Zamin A. Kanji (zamin.kanji@env.ethz.ch)

## Appendix

**Table A1.** Correlation coefficients calculated between INP concentration in the ambient air ( $N_{\text{INP}}$ ) and corresponding fog water ( $N_{\text{INP, fog}}$ ), BT aerosolized ( $N_{\text{INP, BT}}$ ), and seawater ( $N_{\text{INP, SW}}$ ) at selected freezing temperatures. Only  $N_{\text{INP}}$  at the same temperature is correlated.  $r$  value in the bold text represents results with statistical significance ( $p < 0.05$ ).  $r$  value with \* denote moderate correlation ( $0.3 < |r| < 0.7$ ), and with \*\* indicate strong correlation ( $|r| > 0.7$ )

|                                                        | $N_{\text{INP}} (T = -10 \text{ }^\circ\text{C})$ | $N_{\text{INP}} (T = -15 \text{ }^\circ\text{C})$ | $N_{\text{INP}} (T = -20 \text{ }^\circ\text{C})$ |
|--------------------------------------------------------|---------------------------------------------------|---------------------------------------------------|---------------------------------------------------|
| $N_{\text{INP, fog}} (T = -10 \text{ }^\circ\text{C})$ | <b>0.4*</b>                                       | -                                                 | -                                                 |
| $N_{\text{INP, fog}} (T = -15 \text{ }^\circ\text{C})$ | -                                                 | <b>0.449*</b>                                     | -                                                 |
| $N_{\text{INP, fog}} (T = -20 \text{ }^\circ\text{C})$ | -                                                 | -                                                 | <b>0.8**</b>                                      |
| $N_{\text{INP, SW}} (T = -15 \text{ }^\circ\text{C})$  | -                                                 | 0.022                                             | -                                                 |
| $N_{\text{INP, SW}} (T = -20 \text{ }^\circ\text{C})$  | -                                                 | -                                                 | -0.075                                            |
| $N_{\text{INP, BT}} (T = -15 \text{ }^\circ\text{C})$  | -                                                 | <b>0.405*</b>                                     | -                                                 |
| $N_{\text{INP, BT}} (T = -20 \text{ }^\circ\text{C})$  | -                                                 | -                                                 | <b>0.847**</b>                                    |

**Table A2.** Sample information for seawater (SML and SSW) collected off the research vessel *Akademik Tryoshnikov*.

| Seawater sample | Longitude (°E) | Latitude (°N) | Sampling time (UTC) |
|-----------------|----------------|---------------|---------------------|
| SML (SSW)_01    | 76.67          | 79.60         | 14/08/2021 12:00    |
| SML (SSW)_02    | 99.45          | 79.95         | 26/08/2021 05:00    |
| SML (SSW)_03    | 99.45          | 79.95         | 26/08/2021 05:00    |
| SML (SSW)_04    | 101.63         | 79.27         | 27/08/2021 12:00    |

**Table A3.** Information for CTD water samples used for BT experiments. The unit for salinity is the practical salinity unit (PSU).

| CTD station # | Longitude (°E) | Latitude (°N) | Class               | Salinity (PSU) |
|---------------|----------------|---------------|---------------------|----------------|
| CTD_032       | 65.7147        | 81.0011       | MIZ/ice-pack        | 33.2663        |
| CTD_036       | 64.3415        | 82.1657       | MIZ/ice-pack        | 32.4621        |
| CTD_040       | 64.3236        | 82.8329       | MIZ/ice-pack        | 32.6291        |
| CTD_049       | 75.0146        | 81.9994       | MIZ/ice-pack        | 33.4738        |
| CTD_060       | 92.0993        | 81.3992       | MIZ/ice-pack        | 33.1445        |
| CTD_068       | 95.6964        | 81.6344       | MIZ/ice-pack        | 32.5423        |
| CTD_073       | 98.0109        | 80.4291       | MIZ/ice-pack        | 32.9783        |
| CTD_075       | 96.9458        | 80.1735       | MIZ/ice-pack        | 33.2801        |
| Land_075BIS   | 96.32          | 79.43         | Island water bodies | 11.58          |
| Land_078      | 99.40508       | 79.96155      | Island water bodies | 0              |
| Land_080      | 101.588        | 79.284        | Island water bodies | 29.42          |
| CTD_089       | 103.8413       | 79.6741       | Open ocean          | 32.0718        |
| CTD_106       | 99.9998        | 78.797        | Close to island     | 29.8059        |
| CTD_109       | 98.6654        | 77.76         | Close to island     | 14.5673        |
| CTD_114       | 101.6472       | 77.2887       | Close to island     | 14.4459        |
| CTD_117       | 82.5441        | 77.4212       | Open ocean          | 29.716         |
